# Supplementary material for: Efficacy and safety of inhaled ENaC inhibitor BI 1265162 in patients with cystic fibrosis: BALANCE-CF 1, a randomised, phase II study
Source: PubMed Central journal article supplement — Eur Respir J. 2022 Feb 17;59(2):2100746. doi: 10.1183/13993003.00746-2021 (PMC8850685; doi:10.1183/13993003.00746-2021), 2022-02-17

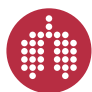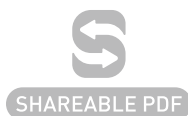

# Efficacy and safety of inhaled ENaC inhibitor BI 1265162 in patients with cystic fibrosis: BALANCE-CF 1, a randomised, phase II study

Christopher H. Goss<sup>1</sup>, Isabelle Fajac<sup>2</sup>, Raksha Jain<sup>3</sup>, Wolfgang Seibold<sup>4</sup>, Abhya Gupta<sup>4</sup>, Ming-Chi Hsu<sup>5,6</sup>, Sivagurunathan Sutharsan<sup>7</sup>, Jane C. Davies<sup>8,9</sup> and Marcus A. Mall <sup>10,11,12</sup>

<sup>1</sup>Dept of Medicine, Dept of Pediatrics, University of Washington, Seattle Children's Hospital and Research Institute, Seattle, WA, USA. <sup>2</sup>AP-HP, Université de Paris, Paris, France. <sup>3</sup>Dept of Medicine, University of Texas Southwestern Medical Center, Dallas, TX, USA. <sup>4</sup>Boehringer Ingelheim, Biberach, Germany. <sup>5</sup>Boehringer Ingelheim, Shanghai, China. <sup>6</sup>Shanghai Junshi Biosciences Co. Ltd, Shanghai, China. <sup>7</sup>Division for Cystic Fibrosis, Dept of Pulmonary Medicine, University Medicine Essen – Ruhrlandklinik, Essen, Germany. <sup>8</sup>National Heart and Lung Institute, Imperial College London, London, UK. <sup>9</sup>Paediatric Respiratory Medicine, Royal Brompton and Harefield Hospitals, London, UK. <sup>10</sup>Dept of Pediatric Respiratory Medicine, Immunology and Critical Care Medicine, Charité – Universitätsmedizin Berlin, Berlin, Germany. <sup>11</sup>Berlin Institute of Health (BIH), Berlin, Germany. <sup>12</sup>German Center for Lung Research (DZL), associated partner site, Berlin, Germany.

Corresponding author: Christopher Goss ([CGoss@medicine.washington.edu](mailto:CGoss@medicine.washington.edu))

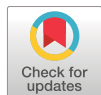

Shareable abstract ([@ERSpublications](https://twitter.com/ERSpublications))

**Phase I trials showed that single and multiple doses of the inhaled ENaC inhibitor BI 1265162 are safe. In this phase II trial in patients with CF, BI 1265162 was safe, but did not demonstrate clinically relevant efficacy. The trial was terminated.** <https://bit.ly/3CiB8uM>

**Cite this article as:** Goss CH, Fajac I, Jain R, *et al.* Efficacy and safety of inhaled ENaC inhibitor BI 1265162 in patients with cystic fibrosis: BALANCE-CF 1, a randomised, phase II study. *Eur Respir J* 2022; 59: 2100746 [DOI: 10.1183/13993003.00746-2021].

This single-page version can be shared freely online.

Copyright ©The authors 2022.

This version is distributed under the terms of the Creative Commons Attribution Non-Commercial Licence 4.0. For commercial reproduction rights and permissions contact [permissions@ersnet.org](mailto:permissions@ersnet.org)

Received: 12 March 2021

Accepted: 19 June 2021

## Abstract

**Background** Inhibition of the epithelial sodium channel (ENaC) in cystic fibrosis (CF) airways provides a mutation-agnostic approach that could improve mucociliary clearance in all CF patients. BI 1265162 is an ENaC inhibitor with demonstrated pre-clinical efficacy and safety already demonstrated in humans.

**Objective** We present results from BALANCE-CF<sup>TM</sup> 1, a phase II, placebo-controlled, randomised, double-blind study of four dose levels of BI 1265162 *versus* placebo for 4 weeks on top of standard of care in adults and adolescents with CF.

**Results** Initially, 28 randomised subjects (BI 1265162 200 µg twice daily n=14, placebo twice daily n=14) were assessed at an interim futility analysis. Compared with placebo, numerical changes of -0.8% (95% CI -6.6 to 4.9%) in percentage predicted forced expiratory volume in 1s (ppFEV<sub>1</sub>) and +2.1 units (95% CI -2.4 to 6.5 units) in lung clearance index (LCI) were observed in the active group, meeting a pre-defined stopping rule; accordingly, the study was terminated. Recruitment had continued during the interim analysis and pending results; 24 patients were added across three dose levels and placebo. The final results including these patients (+1.5% ppFEV<sub>1</sub>, 200 µg twice-daily dose *versus* placebo) were not supportive of relevant clinical effect. Furthermore, LCI change was not supportive, although interpretation was limited due to insufficient traces meeting quality criteria. A 9.4-point improvement in the Cystic Fibrosis Questionnaire – Revised Respiratory Domain was observed in the 200 µg twice daily dose group *versus* placebo. BI 1265162 up to 200 µg twice daily was safe and well-tolerated. Pharmacokinetics were similar to those in healthy volunteers.

**Conclusion** BI 1265162 was safe, but did not demonstrate a potential for clinical benefit. Development has been terminated.

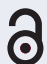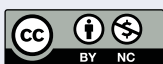

Supplement: ERJ-00746-2021.Shareable.pdf [file ERJ-00746-2021.Shareable.pdf]
